# Supplementary material for: The adjuvant GLA-SE promotes human Tfh cell expansion and emergence of public TCRβ clonotypes
Source: PubMed Central journal article supplement (PMC6683991; doi:10.1084/jem.20190301), 2019-06-07
Supplement: JEM_20190301_sm.pdf [file JEM_20190301_sm.pdf]

## Supplemental material

Hill et al., <https://doi.org/10.1084/jem.20190301>

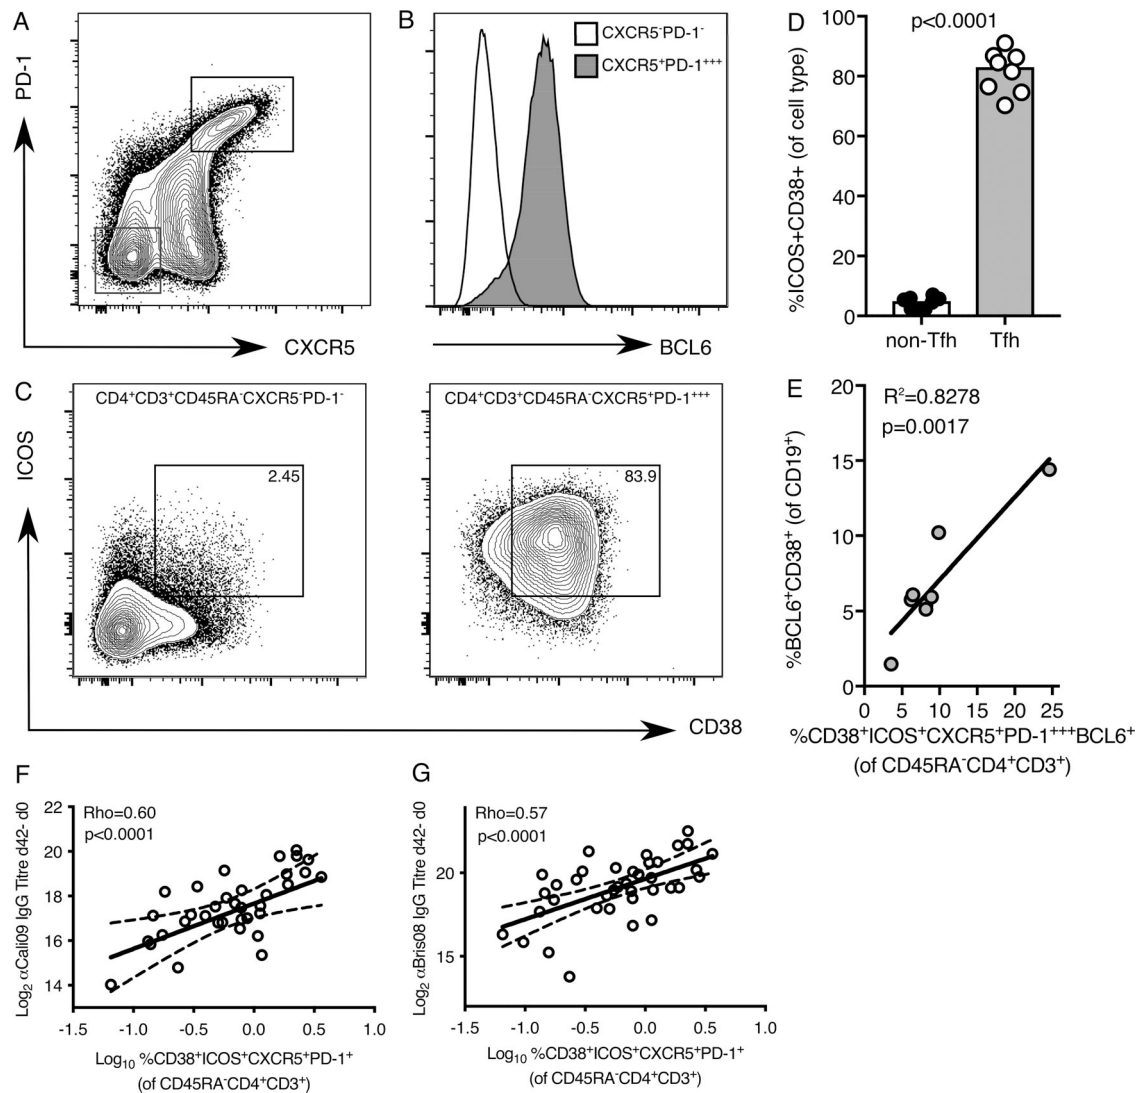

**Figure S1. Tonsil Tfh cells express CD38 and ICOS.** (A and B) Flow cytometric identification of (A) CXCR5<sup>+</sup>PD-1<sup>+++</sup> Tfh cells and CXCR5<sup>+</sup>PD-1<sup>-</sup> non-Tfh cells among CD45RA<sup>-</sup>CD4<sup>+</sup>CD3<sup>+</sup> tonsil cells and their expression of BCL6 (B). (C and D) Contour plots (C) and quantification (D) of ICOS and CD38 expression on tonsil non-Tfh (left) and Tfh cells (right);  $n = 8$ .  $P < 0.0001$ . The  $P$  value was calculated by a Mann-Whitney test. (E) Linear regression analysis of tonsil BCL6<sup>+</sup>CD38<sup>+</sup>CD19<sup>+</sup> GC B cells and BCL6<sup>+</sup>CD38<sup>+</sup>ICOS<sup>+</sup>CXCR5<sup>+</sup>PD-1<sup>+++</sup> Tfh cells;  $n = 7$ .  $R^2 = 0.8278$ ;  $P = 0.0017$ . Each symbol represents one individual. Data are representative of one independent experiment. (F and G) Correlation of the frequency of CD38<sup>+</sup>ICOS<sup>+</sup>CXCR5<sup>+</sup>PD-1<sup>+</sup> cTfh cells 7 d after vaccination with the change in antibody titer of anti-Cal09 IgG (F, an influenza A HA;  $Rho = 0.60$ ;  $P < 0.0001$ ) and anti-Bris08 IgG (G, an influenza B HA;  $Rho = 0.57$ ;  $P < 0.0001$ ) 42 d after vaccination. Statistical analysis by Spearman's correlation ( $Rho =$  coefficient);  $n = 41$ . F and G are from one seasonal influenza vaccination cohort.

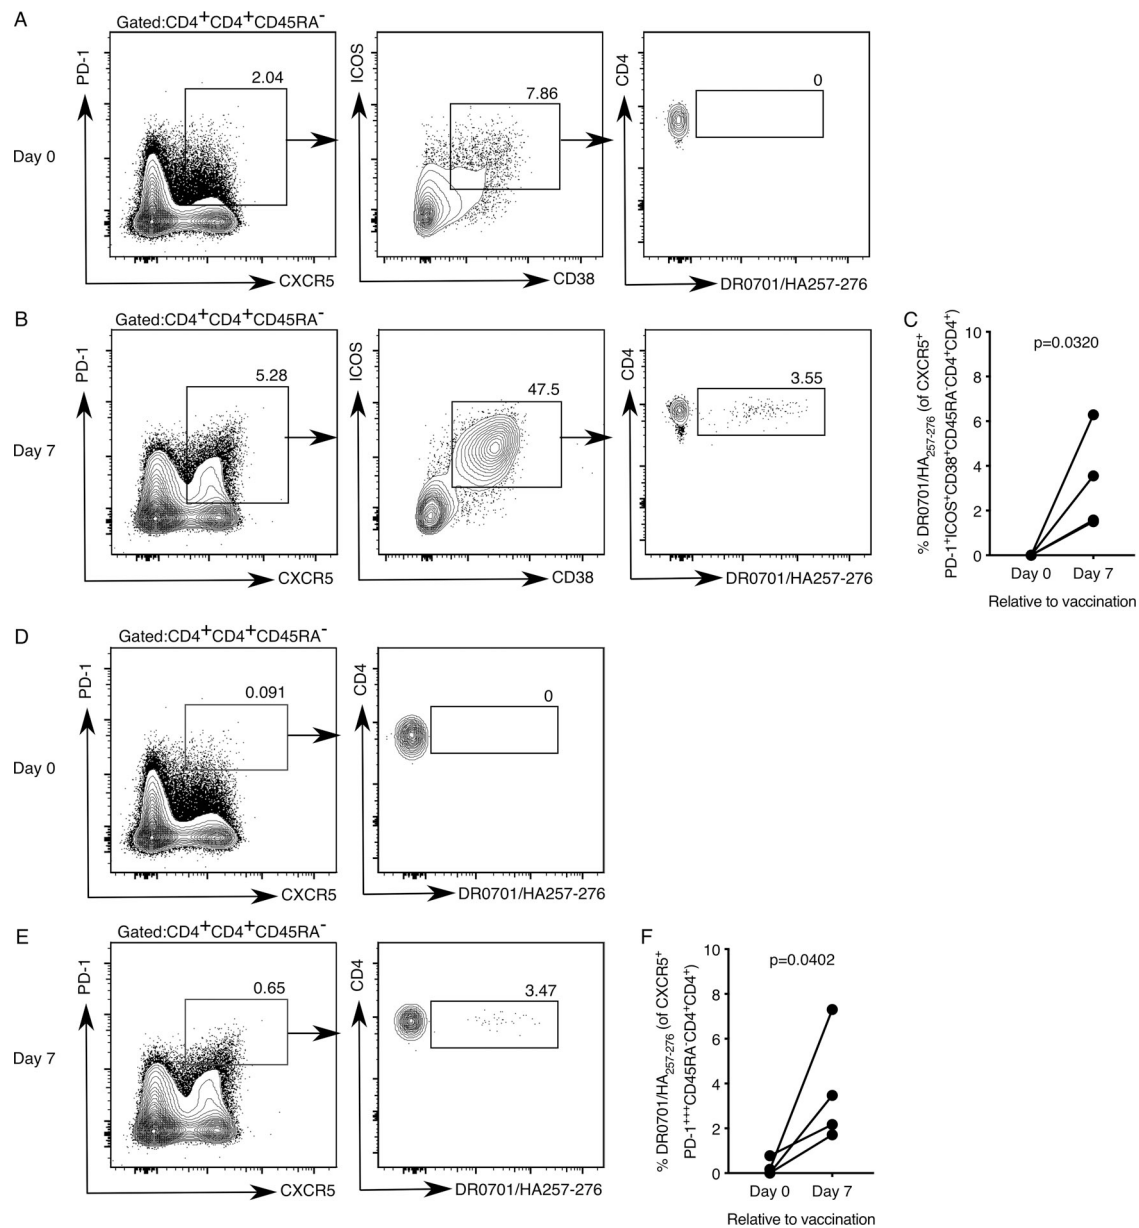

**Figure S2. HA-specific cTfh cells can be identified 7 d after seasonal influenza vaccination. (A–C)** Flow cytometric contour plots (A and B) and quantification (C) of the frequency of HLADRO701/HA<sub>257-276</sub> tetramer binding cells among CD38<sup>+</sup>ICOS<sup>+</sup>CXCR5<sup>+</sup>PD-1<sup>+</sup>CD45RA<sup>-</sup>CD4<sup>+</sup>CD3<sup>+</sup> cells in the peripheral blood of healthy UK donors at days 0 and 7 relative to seasonal influenza vaccination;  $n = 4$ . In C, each symbol represents a volunteer; an individual donor is connected by a line at the two time points;  $n = 4$ .  $P = 0.0320$ . The  $P$  value was generated with a paired Student's  $t$  test. **(D–F)** Flow cytometric contour plots (D and E) and quantification (F) of the frequency of HLADRO701/HA<sub>257-276</sub> tetramer binding cells among CXCR5<sup>+</sup>PD-1<sup>+++</sup>CD45RA<sup>-</sup>CD4<sup>+</sup>CD3<sup>+</sup> cells in the peripheral blood of healthy UK donors at days 0 and 7 relative to seasonal influenza vaccination;  $n = 4$ . In F, each symbol represents a volunteer; an individual donor is connected by a line at the two time points;  $n = 4$ .  $P = 0.0402$ . The  $P$  value was generated with a paired Student's  $t$  test. Data are from one seasonal influenza cohort.

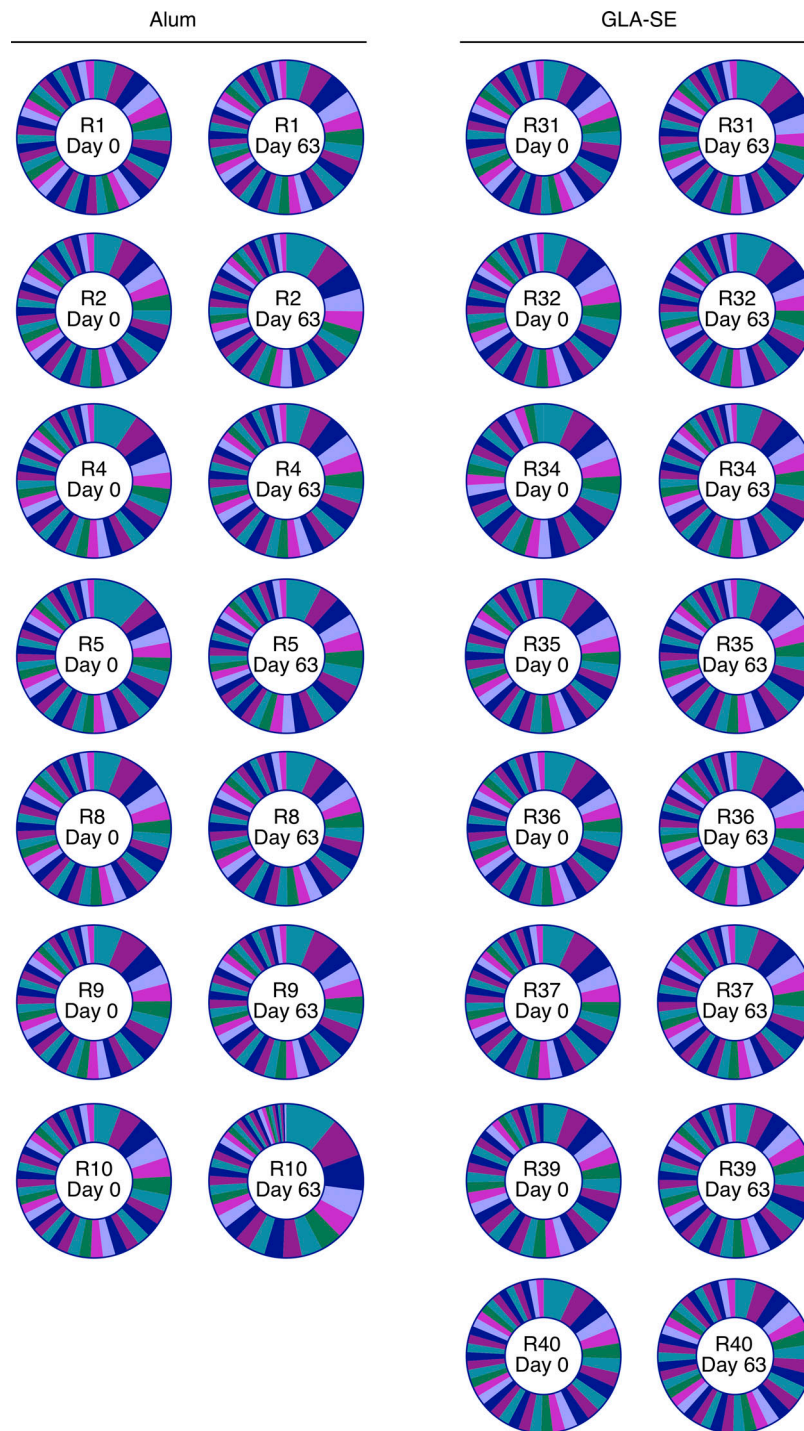

Figure S3. **Abundance of TCR $\beta$  CDR3 clonotypes in cTfh cells.** Pie charts of the proportion of the 40 most abundant TCR $\beta$  CDR3 clonotypes in ICOS<sup>+</sup>CD38<sup>+</sup>CXCR5<sup>+</sup>PD-1<sup>+</sup> cTfh cells of individual P27A study participants at the indicated study time points. Alum group,  $n = 7$ ; GLA-SE group,  $n = 8$ . Each segment of the pie chart represents a unique CDR3 clonotype. The “R” number is the unique participant identifier. Data are from one clinical trial.

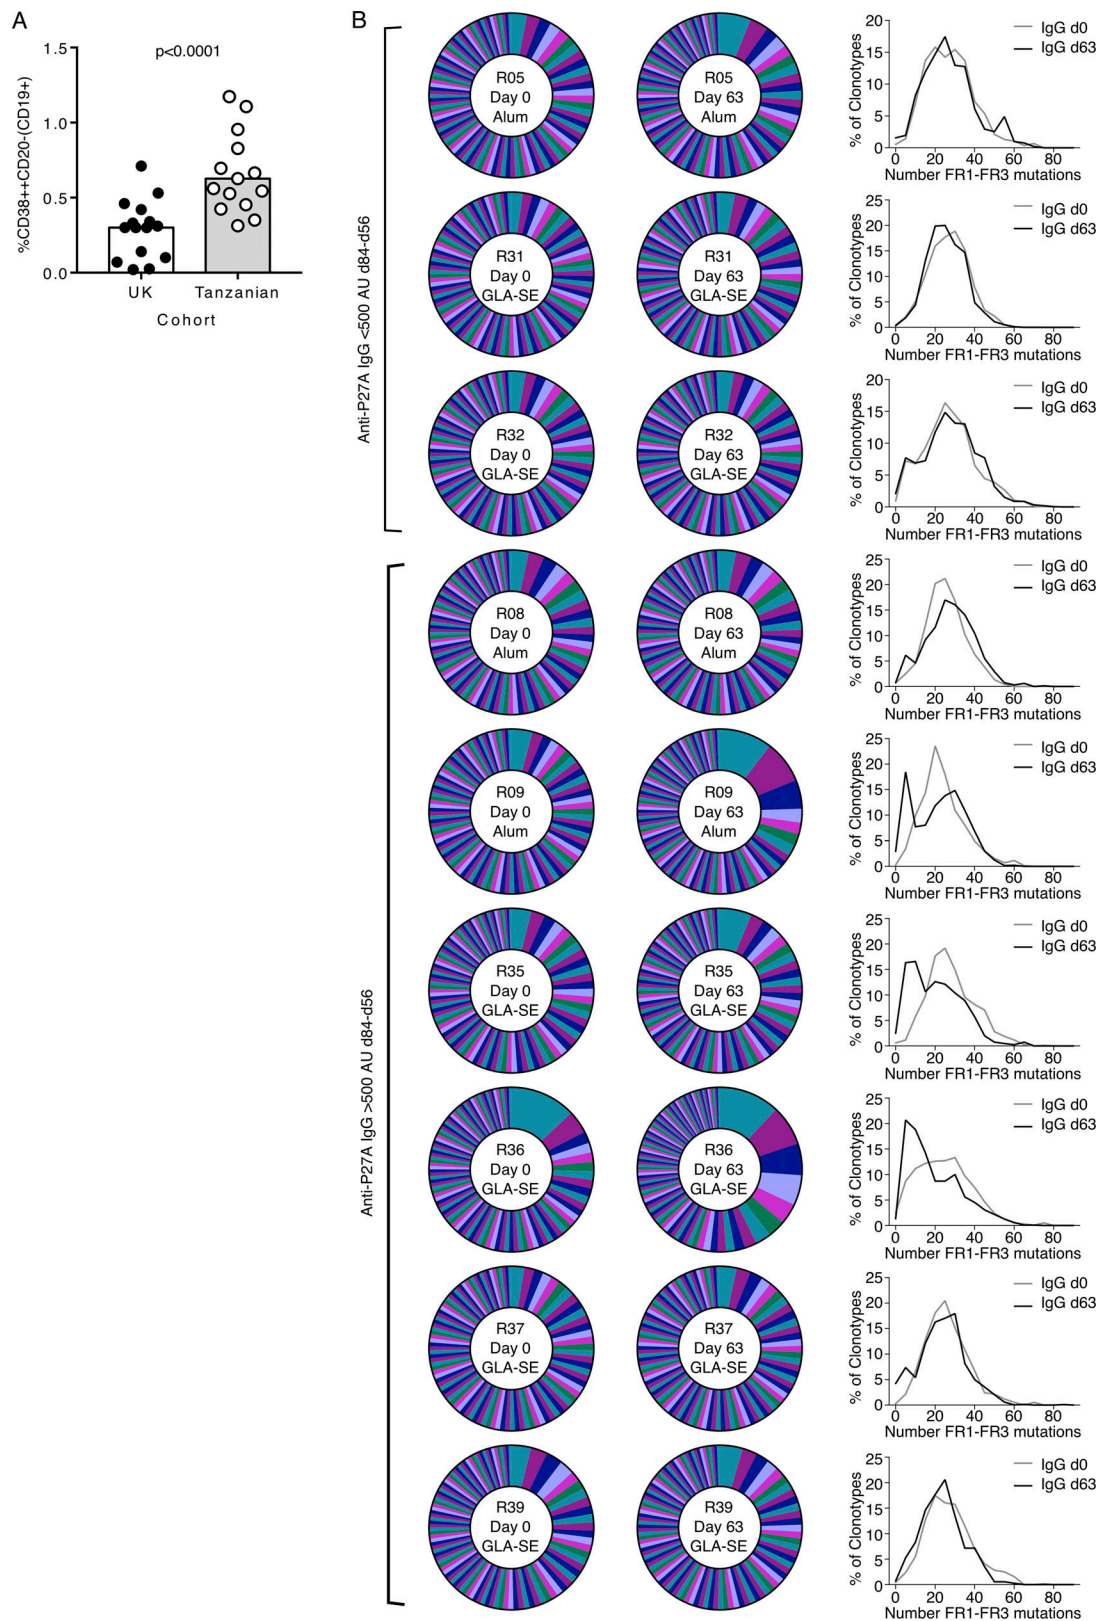

Figure S4. **Tanzanian volunteers had a higher ASC frequency before vaccination and V(D)J sequencing of circulating plasmablasts.** (A) Percentage of CD19<sup>+</sup> lymphocytes that are CD38<sup>2+</sup>CD20<sup>-</sup> in 18–45-yr-olds from either the UK (n = 15) or Tanzania (n = 15) before vaccination. P < 0.0001. The P value was calculated from a Mann-Whitney U test. (B) Pie charts of the proportion of the 100 most abundant BCR clonotypes in CD38<sup>2+</sup>CD20<sup>-</sup>CD19<sup>+</sup> ASCs of individual P27A study participants at the indicated study time points. Each segment of the pie chart represents a unique BCR clonotype (FR1–FR4 regions). Alum group, n = 3; GLA-SE group, n = 6. The “R” number is the unique participant identifier. Line graphs show the number of mutations in the V region per clonotype (FR1–FR3, split into bins of five mutations) in each individual before vaccination and 7 d after the third vaccination (d63). Data are from one clinical trial.

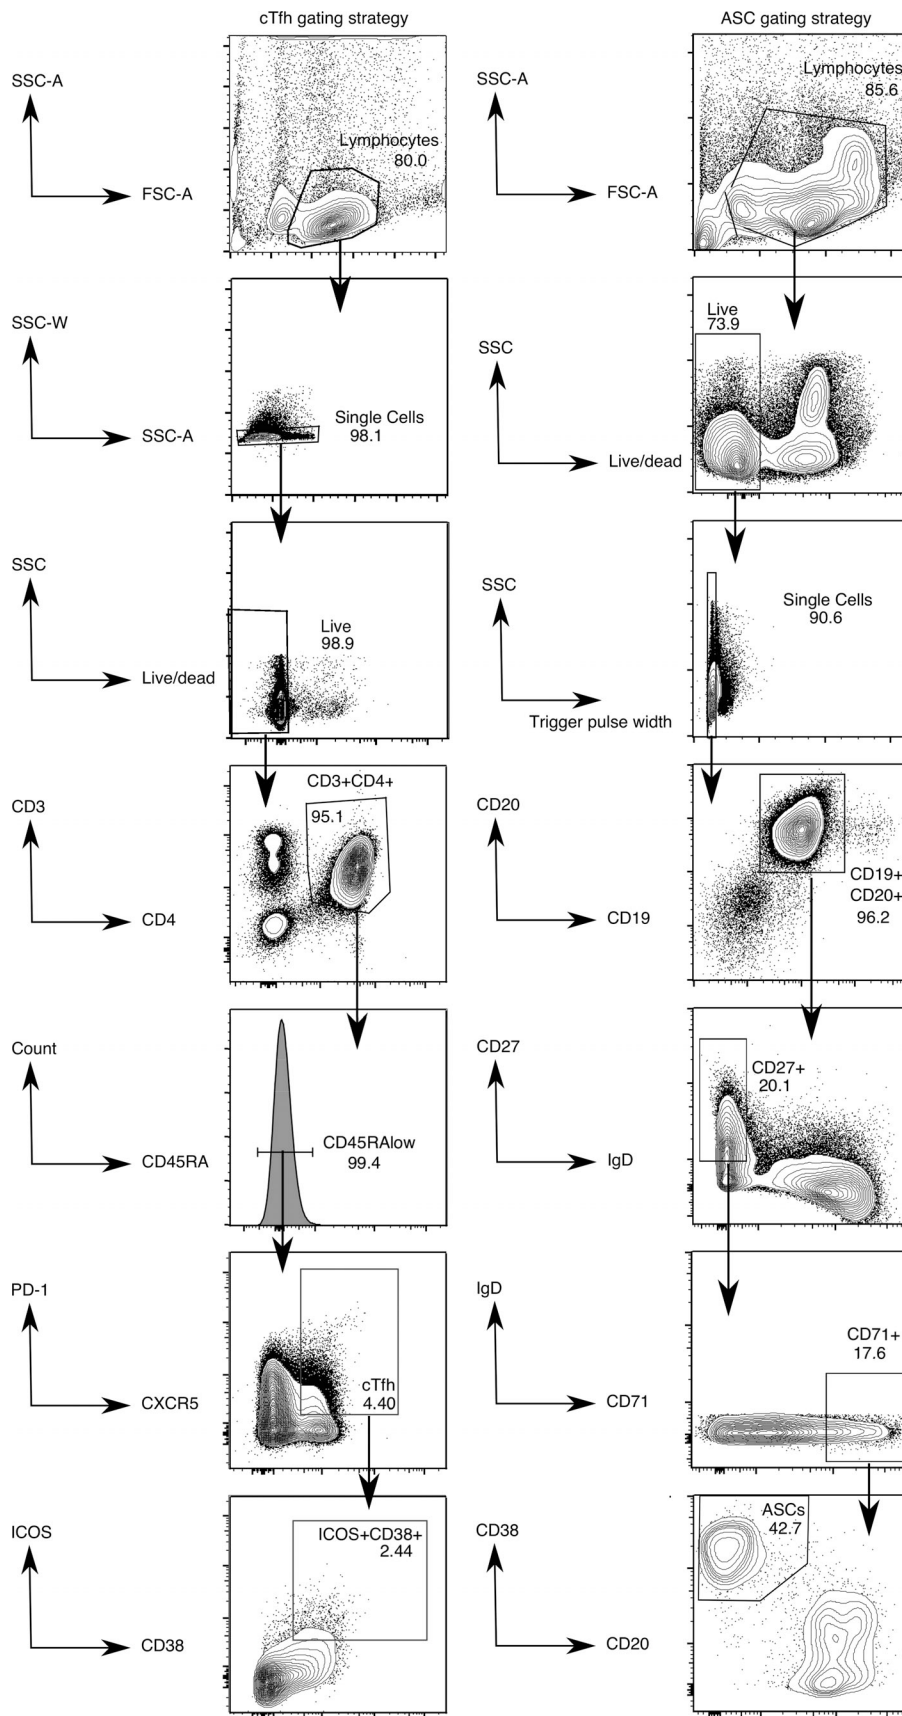

Figure S5. **Gating strategy for fluorescence-activated cell sorting of cTfh and ASCs.** Representative flow cytometry plots for the gating strategy for cTfh cells (left) and ASCs (right) with parameter axes labels shown alongside.
